# Supplementary material
Source: publisher figshare collection journal article supplement (https://tandf.figshare.com/articles/dataset/_/5771181)
Supplement: Supplementary file 1 [file 1]

# Analysis of Cancer Data with Boosting Algorithm for Nonconvex Loss

Zhu Wang  
Connecticut Children's Medical Center  
University of Connecticut School of Medicine  
zwang@connecticutchildrens.org

June 17, 2016

This document presents analysis for the MAQC-II project, human breast cancer data set with boosting algorithms developed in Wang (2016a,b) and implemented in R package `bst`.

Dataset comes from the MicroArray Quality Control (MAQC) II project and includes 278 breast cancer samples with 164 estrogen receptor (ER) positive cases. The data files `GSE20194_series_matrix.txt.gz` and `GSE20194_MDACC_Sample_Info.xls` can be downloaded from <http://www.ncbi.nlm.nih.gov/geo/query/acc.cgi?token=rhojvaiwkcsaihq&acc=GSE20194>. After reading the data, some unused variables are removed. From 22283 genes, the dataset is pre-screened to obtain 3000 genes with the largest absolute values of the two-sample t-statistics. The 3000 genes are standardized.

```
# The data files below were downloaded on June 1, 2016
require("gdata")
bc <- t(read.delim("GSE20194_series_matrix.txt.gz", sep = "",
header = FALSE, skip = 80))
colnames(bc) <- bc[1, ]
bc <- bc[-1, -c(1, 2)]
### The last column is empty with variable name
### !series_matrix_table_end, thus omitted
bc <- bc[, -22284]
mode(bc) <- "numeric" ### convert character to numeric
dat1 <- read.xls("GSE20194_MDACC_Sample_Info.xls", sheet = 1,
header = TRUE)
y <- dat1$characteristics..ER_status
y <- ifelse(y == "P", 1, -1)
table(y)
res <- rep(NA, dim(bc)[2])
for (i in 1:dim(bc)[2]) res[i] <- abs(t.test(bc[, i] ~ y)$statistic)
### find 3000 largest absolute value of t-statistic
tmp <- order(res, decreasing = TRUE)[1:3000]
dat <- bc[, tmp]
### standardize variables
dat <- scale(dat)
```

Set up configuration parameters.

```
nrun <- 100
per <- c(0, 0.05, 0.1, 0.15)
learntype <- c("tree", "ls")[2]
tuning <- "error"
n.cores <- 5
plot.it <- TRUE
### robust tuning parameters used in bst/rbst function
s <- c(0.9, 1.01, 0.5, -0.2, 0.8, -0.5, -0.2)
nu <- c(0.01, 0.1, 0.01, rep(0.1, 4))
m <- 100 ### boosting iteration number
### whether to truncate the predicted values in each boosting
### iteration?
ctr.trun <- c(TRUE, rep(FALSE, 6))
### used in bst function
bsttype <- c("closs", "gloss", "qloss", "binom", "binom", "hinge",
"expo")
### and corresponding labels
bsttype1 <- c("ClossBoost", "GlossBoost", "QlossBoost", "LogitBoost",
"LogitBoost", "HingeBoost", "AdaBoost")
### used in rbst function
rbsttype <- c("closs", "gloss", "qloss", "tbinom", "binomd",
"thinge", "texpo")
### and corresponding labels
rbsttype1 <- c("ClossBoostQM", "GlossBoostQM", "QlossBoostQM",
"LogitBoost", "DlogitBoost", "THingeBoost", "TAdaBoost")
```

The training data contains randomly selected 50 samples with positive estrogen receptor status and 50 samples with negative estrogen receptor status, and the rest were designated as the test data. The training data is contaminated by randomly switching response variable labels at varying pre-specified proportions `per=0, 0.05, 0.1, 0.15`. This process is repeated `nrun=100` times. The base learner is `learntype=ls`. To select optimal boosting iteration from maximum value of `m=100`, we run five-fold cross-validation averaging classification errors. In cross-validation, we set the number of cores for parallel computing by `n.cores=5`. Selected results can be plotted if `plot.it=TRUE`. Gradient based boosting includes `ClossBoost`, `GlossBoost`, `QlossBoost`, `LogitBoost`, `HingeBoost` and `AdaBoost`. Robust boosting using `rbst` contains `ClossBoostQM`, `GlossBoostQM`, `QlossBoostQM`, `TLogitBoost`, `DlogitBoost`, `THingeBoost` and `TAdaBoost`.

```
summary7 <- function(x) c(summary(x), sd = sd(x))
ptm <- proc.time()
for (k in 1:7) {
  ### k controls which family in bst, and rfamily in rbst
  err.m1 <- err.m2 <- nvar.m1 <- nvar.m2 <- errbest.m1 <- errbest.m2 <- matrix(NA,
ncol = 4, nrow = nrun)
  mstopbest.m1 <- mstopbest.m2 <- mstopcv.m1 <- mstopcv.m2 <- matrix(NA,
ncol = 4, nrow = nrun)
```

```

colnames(err.m1) <- colnames(err.m2) <- c("cont-0%", "cont-5%",
"cont-10%", "cont-15%")
colnames(mstopcv.m1) <- colnames(mstopcv.m2) <- colnames(err.m1)
colnames(nvar.m1) <- colnames(nvar.m2) <- colnames(err.m1)
colnames(errbest.m1) <- colnames(errbest.m2) <- colnames(err.m1)
colnames(mstopbest.m1) <- colnames(mstopbest.m2) <- colnames(err.m1)
for (ii in 1:nrun) {
  set.seed(1000 + ii)
  trid <- c(sample(which(y == 1))[1:50], sample(which(y ==
-1))[1:50])
  dtr <- dat[trid, ]
  dte <- dat[-trid, ]
  ytrold <- y[trid]
  yte <- y[-trid]
  ### number of patients/no. variables in training and test data
  dim(dtr)
  dim(dte)
  ### randomly contaminate data
  ntr <- length(trid)
  set.seed(1000 + ii)
  con <- sample(ntr)
  for (j in 1) {
    ### controls learntype i controls how many percentage of data
    ### contaminated
    for (i in 1:4) {
      ytr <- ytrold
      percon <- per[i]
      ### randomly flip labels of the samples in training set
      ### according to pre-defined contamination level
      if (percon > 0) {
        ji <- con[1:(percon * ntr)]
        ytr[ji] <- -ytrold[ji]
      }
      dat.m1 <- bst(x = dtr, y = ytr, ctrl = bst_control(mstop = m,
center = FALSE, trace = FALSE, nu = nu[k],
s = s[k], trun = ctr.trun[k]), family = bsttype[k],
learner = learntype[j])
      err1 <- predict(dat.m1, newdata = dte, newy = yte,
type = "error")
      err1tr <- predict(dat.m1, newdata = dtr, newy = ytr,
type = "loss")
      ### cross-validation to select best boosting iteration
      set.seed(1000 + ii)
      cvm1 <- cv.bst(x = dtr, y = ytr, K = 5, n.cores = n.cores,
ctrl = bst_control(mstop = m, center = FALSE,
trace = FALSE, nu = nu[k], s = s[k], trun = ctr.trun[k]),
family = bsttype[k], learner = learntype[j],
main = bsttype[k], type = tuning, plot.it = FALSE)
      optmstop <- max(10, which.min(cvm1$cv))
    }
  }
}

```

```

err.m1[ii, i] <- err1[optmstop]
nvar.m1[ii, i] <- nsel(dat.m1, optmstop)[optmstop]
errbest.m1[ii, i] <- min(err1)
mstopbest.m1[ii, i] <- which.min(err1)
mstopcv.m1[ii, i] <- optmstop
dat.m2 <- rbst(x = dtr, y = ytr, ctrl = bst_control(mstop = m,
iter = 100, nu = nu[k], s = s[k], trun = ctr.trun[k],
center = FALSE, trace = FALSE), rfamily = rbsttype[k],
learner = learntype[j])
err2 <- predict(dat.m2, newdata = dte, newy = yte,
type = "error")
err2tr <- predict(dat.m2, newdata = dtr, newy = ytr,
type = "loss")
### cross-validation to select best boosting iteration
set.seed(1000 + ii)
cvm2 <- cv.rbst(x = dtr, y = ytr, K = 5, n.cores = n.cores,
ctrl = bst_control(mstop = m, iter = 100, nu = nu[k],
s = s[k], trun = ctr.trun[k], center = FALSE,
trace = FALSE), rfamily = rbsttype[k], learner = learntype[j],
main = rbsttype[k], type = tuning, plot.it = FALSE)
optmstop <- max(10, which.min(cvm2$cv))
err.m2[ii, i] <- err2[optmstop]
nvar.m2[ii, i] <- nsel(dat.m2, optmstop)[optmstop]
errbest.m2[ii, i] <- min(err2)
mstopbest.m2[ii, i] <- which.min(err2)
mstopcv.m2[ii, i] <- optmstop
}
}
if (ii%%nrun == 0) {
cat("ii=", ii, "\n")
if (bsttype[k] %in% c("closs", "gloss", "qloss"))
cat(paste("\nbst family ", bsttype1[k], ", s=",
s[k], ", nu=", nu[k], sep = ""), "\n")
if (bsttype[k] %in% c("binom", "hinge", "expo"))
cat(paste("\nbst family ", bsttype1[k], ", nu=",
nu[k], sep = ""), "\n")
cat("best misclassification error from bst\n")
print(round(apply(errbest.m1, 2, summary7), 4))
cat("CV based misclassification error from bst\n")
print(round(apply(err.m1, 2, summary7), 4))
cat("best mstop with best misclassification error from bst\n")
print(round(apply(mstopbest.m1, 2, summary7), 0))
cat("best mstop with CV from bst\n")
print(round(apply(mstopcv.m1, 2, summary7), 0))
cat("nvar from bst\n")
print(round(apply(nvar.m1, 2, summary7), 1))

cat(paste("\nrbst family ", rbsttype1[k], ", s=",
s[k], ", nu=", nu[k], sep = ""), "\n")

```

```

cat("\nbest misclassification error from rbst\n")
print(round(apply(errbest.m2, 2, summary7), 4))
cat("CV based misclassification error from rbst\n")
print(round(apply(err.m2, 2, summary7), 4))
cat("best mstop with best misclassification error from rbst\n")
print(round(apply(mstopbest.m2, 2, summary7), 0))
cat("best mstop with CV from rbst\n")
print(round(apply(mstopcv.m2, 2, summary7), 0))
cat("nvar from rbst\n")
print(round(apply(nvar.m2, 2, summary7), 1))
res <- list(err.m1 = err.m1, nvar.m1 = nvar.m1, errbest.m1 = errbest.m1,
mstopbest.m1 = mstopbest.m1, mstopcv.m1 = mstopcv.m1,
err.m2 = err.m2, nvar.m2 = nvar.m2, errbest.m2 = errbest.m2,
mstopbest.m2 = mstopbest.m2, mstopcv.m2 = mstopcv.m2,
s = s[k], nu = nu[k], trun = ctr.trun[k], family = bsttype[k],
rfamily = rbsttype[k])
if (plot.it) {
  par(mfrow = c(2, 1))
  boxplot(err.m1, main = "Misclassification error",
subset = "", sub = bsttype1[k])
  boxplot(err.m2, main = "Misclassification error",
subset = "", sub = rbsttype1[k])
  boxplot(nvar.m1, main = "No. variables", subset = "",
sub = bsttype1[k])
  boxplot(nvar.m2, main = "No. variables", subset = "",
sub = rbsttype1[k])
}
check <- FALSE
if (check) {
  par(mfrow = c(3, 1))
  title <- paste("percentage of contamination ",
percon, sep = "")
  plot(err2tr, main = title, ylab = "Loss value",
xlab = "Iteration", type = "l", lty = "dashed",
col = "red")
  points(err1tr, type = "l", lty = "solid", col = "black")
  legend("topright", c(bsttype1[k], rbsttype1[k]),
lty = c("solid", "dashed"), col = c("black",
"red"))
  plot(err2, main = title, ylab = "Misclassification error",
xlab = "Iteration", type = "l", lty = "dashed",
col = "red")
  points(err1, type = "l")
  legend("bottomright", c(bsttype1[k], rbsttype1[k]),
lty = c("solid", "dashed"), col = c("black",
"red"))
  plot(nsel(dat.m2, m), main = title, ylab = "No. variables",
xlab = "Iteration", lty = "dashed", col = "red",
type = "l")

```

```

    points(nsel(dat.m1, m), ylab = "No. variables",
          xlab = "Iteration", lty = "solid", type = "l",
          col = "black")
    legend("bottomright", c(bsttype1[k], rbsttype1[k]),
          lty = c("solid", "dashed"), col = c("black",
          "red"))
  }
}
}
##
## bst family ClossBoost, s=0.9, nu=0.01
## best misclassification error from bst
##      cont-0% cont-5% cont-10% cont-15%
## Min.      0.0506 0.0506  0.0449  0.0449
## 1st Qu.    0.0730 0.0730  0.0786  0.0786
## Median     0.0786 0.0843  0.0843  0.1011
## Mean       0.0804 0.0837  0.0971  0.1172
## 3rd Qu.    0.0843 0.0899  0.1081  0.1461
## Max.       0.1292 0.1404  0.2079  0.2528
## sd         0.0135 0.0154  0.0309  0.0480
## CV based misclassification error from bst
##      cont-0% cont-5% cont-10% cont-15%
## Min.       0.0618 0.0562  0.0618  0.0618
## 1st Qu.    0.0843 0.0843  0.0899  0.0955
## Median     0.0899 0.0955  0.1011  0.1152
## Mean       0.0909 0.0946  0.1138  0.1338
## 3rd Qu.    0.1011 0.1025  0.1306  0.1573
## Max.       0.1292 0.1798  0.2360  0.2865
## sd         0.0139 0.0190  0.0385  0.0530
## best mstop with best misclassification error from bst
##      cont-0% cont-5% cont-10% cont-15%
## Min.         1         1         1         1
## 1st Qu.       30        29        37        42
## Median        50        48        60        66
## Mean          49        47        56        61
## 3rd Qu.       72        66        80        89
## Max.         100       100       100       100
## sd           30        29        30        31
## best mstop with CV from bst
##      cont-0% cont-5% cont-10% cont-15%
## Min.         10        10        10        10
## 1st Qu.       10        18        33        52
## Median        39        46        50        68
## Mean          40        47        52        65
## 3rd Qu.       60        71        71        86
## Max.         100       100       100       100
## sd           29        30        27        24
## nvar from bst

```

```

##          cont-0% cont-5% cont-10% cont-15%
## Min.      1.0      1.0      1.0      1.0
## 1st Qu.   1.0      1.0      1.0      2.0
## Median    1.0      2.0      2.0      4.0
## Mean      2.4      3.1      3.2      3.8
## 3rd Qu.   3.0      4.2      5.0      5.0
## Max.     10.0     12.0     11.0     11.0
## sd        2.1      2.7      2.4      2.4
##
## rbst family ClossBoostQM, s=0.9, nu=0.01
##
## best misclassification error from rbst
##          cont-0% cont-5% cont-10% cont-15%
## Min.     0.0506  0.0562  0.0449  0.0506
## 1st Qu.  0.0730  0.0730  0.0730  0.0772
## Median   0.0786  0.0786  0.0843  0.0843
## Mean     0.0792  0.0804  0.0870  0.0958
## 3rd Qu.  0.0843  0.0899  0.0955  0.1067
## Max.     0.1067  0.1180  0.1854  0.2303
## sd       0.0126  0.0125  0.0212  0.0330
## CV based misclassification error from rbst
##          cont-0% cont-5% cont-10% cont-15%
## Min.     0.0562  0.0618  0.0562  0.0674
## 1st Qu.  0.0786  0.0843  0.0843  0.0899
## Median   0.0899  0.0899  0.0955  0.1011
## Mean     0.0903  0.0923  0.1024  0.1146
## 3rd Qu.  0.1011  0.1011  0.1067  0.1236
## Max.     0.1180  0.1236  0.2022  0.2640
## sd       0.0138  0.0140  0.0256  0.0401
## best mstop with best misclassification error from rbst
##          cont-0% cont-5% cont-10% cont-15%
## Min.      1       1       1       1
## 1st Qu.   14      9       6       9
## Median    28     22      22      19
## Mean     31     26      27      31
## 3rd Qu.  48     38      37      52
## Max.     91    100     99     100
## sd       22     22     25     30
## best mstop with CV from rbst
##          cont-0% cont-5% cont-10% cont-15%
## Min.     10     10     10     10
## 1st Qu.  10     10     10     10
## Median   19     16     19     14
## Mean     28     28     33     31
## 3rd Qu.  41     40     53     47
## Max.     99    100     95    100
## sd       22     24     27     28
## nvar from rbst
##          cont-0% cont-5% cont-10% cont-15%

```

```

## Min.      1.0      1.0      1.0      1.0
## 1st Qu.   1.0      1.0      1.0      1.0
## Median    2.0      2.0      2.0      2.0
## Mean      3.1      3.3      4.0      4.3
## 3rd Qu.   4.0      4.0      6.0      6.0
## Max.      15.0     16.0     14.0     16.0
## sd        3.1      3.3      3.6      4.1
##
## bst family GlossBoost, s=1.01, nu=0.1
## best misclassification error from bst
##          cont-0% cont-5% cont-10% cont-15%
## Min.     0.0449  0.0506  0.0449  0.0562
## 1st Qu.   0.0730  0.0730  0.0786  0.0829
## Median    0.0786  0.0843  0.0843  0.1011
## Mean      0.0812  0.0836  0.0948  0.1126
## 3rd Qu.   0.0899  0.0899  0.1067  0.1348
## Max.      0.1292  0.1236  0.1910  0.2584
## sd        0.0138  0.0142  0.0280  0.0426
## CV based misclassification error from bst
##          cont-0% cont-5% cont-10% cont-15%
## Min.     0.0562  0.0562  0.0562  0.0618
## 1st Qu.   0.0786  0.0843  0.0899  0.0955
## Median    0.0899  0.0927  0.1011  0.1236
## Mean      0.0912  0.0947  0.1121  0.1319
## 3rd Qu.   0.1011  0.1011  0.1292  0.1573
## Max.      0.1798  0.1966  0.2360  0.3258
## sd        0.0166  0.0191  0.0370  0.0496
## best mstop with best misclassification error from bst
##          cont-0% cont-5% cont-10% cont-15%
## Min.      1       1       1       1
## 1st Qu.   19      16      22      23
## Median    45      36      40      48
## Mean      45      40      45      48
## 3rd Qu.   70      59      70      77
## Max.      99      100     99      100
## sd        30      28      31      32
## best mstop with CV from bst
##          cont-0% cont-5% cont-10% cont-15%
## Min.      10      10      10      10
## 1st Qu.   10      10      17      28
## Median    20      31      32      44
## Mean      30      39      39      48
## 3rd Qu.   45      55      54      72
## Max.      95      100     100     98
## sd        24      29      26      28
## nvar from bst
##          cont-0% cont-5% cont-10% cont-15%
## Min.      1.0      1.0      1.0      1.0
## 1st Qu.   1.0      1.0      1.0      2.0

```



```

## Median      1.0      2.0      2.0      4.0
## Mean        1.9      2.7      3.0      4.4
## 3rd Qu.     2.0      3.0      4.0      6.2
## Max.        9.0     12.0     10.0     13.0
## sd          1.6      2.3      2.2      3.2
##
## rbst family GlossBoostQM, s=1.01, nu=0.1
##
## best misclassification error from rbst
##          cont-0% cont-5% cont-10% cont-15%
## Min.     0.0506  0.0562  0.0449  0.0562
## 1st Qu.  0.0730  0.0730  0.0730  0.0786
## Median   0.0786  0.0786  0.0843  0.0899
## Mean     0.0811  0.0826  0.0910  0.1037
## 3rd Qu.  0.0899  0.0899  0.1011  0.1250
## Max.     0.1292  0.1124  0.1910  0.2360
## sd       0.0137  0.0132  0.0264  0.0391
## CV based misclassification error from rbst
##          cont-0% cont-5% cont-10% cont-15%
## Min.     0.0562  0.0618  0.0562  0.0618
## 1st Qu.  0.0829  0.0843  0.0899  0.0899
## Median   0.0899  0.0955  0.1011  0.1096
## Mean     0.0910  0.0940  0.1067  0.1238
## 3rd Qu.  0.1011  0.1011  0.1124  0.1517
## Max.     0.1461  0.1629  0.2135  0.2640
## sd       0.0148  0.0177  0.0315  0.0433
## best mstop with best misclassification error from rbst
##          cont-0% cont-5% cont-10% cont-15%
## Min.      1       1       1       1
## 1st Qu.   22      10       8       8
## Median    46      37      29      20
## Mean      46      37      34      32
## 3rd Qu.   73      56      52      55
## Max.     100     97      100     100
## sd        30      29      29      30
## best mstop with CV from rbst
##          cont-0% cont-5% cont-10% cont-15%
## Min.      10      10      10      10
## 1st Qu.   10      10      10      10
## Median    10      19      22      20
## Mean      31      33      35      32
## 3rd Qu.   50      48      54      47
## Max.     100     98      97      96
## sd        27      27      28      27
## nvar from rbst
##          cont-0% cont-5% cont-10% cont-15%
## Min.      1.0     1.0     1.0     1.0
## 1st Qu.   1.0     1.0     1.0     1.0
## Median    1.0     2.0     2.0     2.0

```

```

## Mean      2.5      2.6      3.2      3.8
## 3rd Qu.   3.0      3.0      4.2      5.2
## Max.      11.0     11.0     11.0     13.0
## sd        2.4      2.4      2.6      3.4
##
## bst family QlossBoost, s=0.5, nu=0.01
## best misclassification error from bst
##          cont-0% cont-5% cont-10% cont-15%
## Min.     0.0449  0.0506  0.0449  0.0562
## 1st Qu.  0.0730  0.0730  0.0786  0.0829
## Median   0.0786  0.0843  0.0843  0.1011
## Mean     0.0812  0.0835  0.0948  0.1132
## 3rd Qu.  0.0899  0.0899  0.1067  0.1348
## Max.     0.1292  0.1180  0.1910  0.2584
## sd       0.0139  0.0140  0.0278  0.0434
## CV based misclassification error from bst
##          cont-0% cont-5% cont-10% cont-15%
## Min.     0.0562  0.0562  0.0562  0.0562
## 1st Qu.  0.0786  0.0843  0.0899  0.0955
## Median   0.0899  0.0955  0.1011  0.1292
## Mean     0.0908  0.0952  0.1120  0.1340
## 3rd Qu.  0.1011  0.1011  0.1306  0.1545
## Max.     0.1798  0.1966  0.2360  0.3258
## sd       0.0167  0.0192  0.0367  0.0511
## best mstop with best misclassification error from bst
##          cont-0% cont-5% cont-10% cont-15%
## Min.      1       1       1       1
## 1st Qu.   19      17      25      23
## Median    39      38      42      52
## Mean      42      40      47      49
## 3rd Qu.   64      60      72      78
## Max.      98      100     99      100
## sd        29      28      31      33
## best mstop with CV from bst
##          cont-0% cont-5% cont-10% cont-15%
## Min.      10      10      10      10
## 1st Qu.   10      10      18      28
## Median    24      32      39      45
## Mean      32      38      41      49
## 3rd Qu.   49      56      58      70
## Max.      99      98      97      100
## sd        24      27      27      28
## nvar from bst
##          cont-0% cont-5% cont-10% cont-15%
## Min.      1.0     1.0     1.0     1.0
## 1st Qu.   1.0     1.0     1.0     2.0
## Median    1.0     2.0     2.0     3.0
## Mean      2.0     2.6     3.2     4.1
## 3rd Qu.   2.0     3.0     5.0     6.2

```

```

## Max.      10.0    11.0    10.0    12.0
## sd       1.7     2.2     2.3     3.0
##
## rbst family QlossBoostQM, s=0.5, nu=0.01
##
## best misclassification error from rbst
##      cont-0% cont-5% cont-10% cont-15%
## Min.    0.0506 0.0562 0.0449 0.0562
## 1st Qu. 0.0730 0.0730 0.0772 0.0786
## Median  0.0786 0.0786 0.0843 0.0899
## Mean    0.0811 0.0822 0.0908 0.1026
## 3rd Qu. 0.0899 0.0899 0.1011 0.1250
## Max.    0.1292 0.1124 0.1910 0.2360
## sd      0.0136 0.0131 0.0260 0.0386
## CV based misclassification error from rbst
##      cont-0% cont-5% cont-10% cont-15%
## Min.    0.0562 0.0618 0.0562 0.0618
## 1st Qu. 0.0786 0.0843 0.0899 0.0899
## Median  0.0899 0.0927 0.1011 0.1067
## Mean    0.0909 0.0946 0.1064 0.1225
## 3rd Qu. 0.1011 0.1011 0.1124 0.1461
## Max.    0.1517 0.1573 0.2191 0.2640
## sd      0.0154 0.0170 0.0313 0.0428
## best mstop with best misclassification error from rbst
##      cont-0% cont-5% cont-10% cont-15%
## Min.      1      1      1      1
## 1st Qu.   18     14      6      7
## Median   42     38     26     20
## Mean     43     38     33     33
## 3rd Qu.  69     58     50     54
## Max.    100     96     97     99
## sd      30     28     29     31
## best mstop with CV from rbst
##      cont-0% cont-5% cont-10% cont-15%
## Min.     10     10     10     10
## 1st Qu.  10     10     10     10
## Median   10     24     23     26
## Mean     29     34     33     35
## 3rd Qu.  46     51     46     54
## Max.     93     100    99     96
## sd      24     28     27     28
## nvar from rbst
##      cont-0% cont-5% cont-10% cont-15%
## Min.     1.0    1.0    1.0    1.0
## 1st Qu.  1.0    1.0    1.0    1.0
## Median   1.0    2.0    2.0    3.0
## Mean     2.4    2.8    3.1    4.1
## 3rd Qu.  3.0    3.0    4.0    7.0
## Max.    11.0   12.0   12.0   15.0

```

```

## sd          2.2      2.6      2.6      3.6
##
## bst family LogitBoost, nu=0.1
## best misclassification error from bst
##          cont-0% cont-5% cont-10% cont-15%
## Min.      0.0449  0.0562  0.0449  0.0506
## 1st Qu.   0.0730  0.0730  0.0786  0.1053
## Median    0.0843  0.0843  0.1124  0.1433
## Mean      0.0824  0.0896  0.1146  0.1487
## 3rd Qu.   0.0899  0.1067  0.1419  0.1798
## Max.      0.1461  0.1517  0.2303  0.3258
## sd        0.0152  0.0208  0.0419  0.0606
## CV based misclassification error from bst
##          cont-0% cont-5% cont-10% cont-15%
## Min.      0.0506  0.0562  0.0618  0.0562
## 1st Qu.   0.0843  0.0885  0.0997  0.1222
## Median    0.0899  0.1039  0.1348  0.1657
## Mean      0.0907  0.1027  0.1341  0.1735
## 3rd Qu.   0.1011  0.1180  0.1587  0.2107
## Max.      0.1573  0.1573  0.2697  0.3876
## sd        0.0145  0.0218  0.0444  0.0703
## best mstop with best misclassification error from bst
##          cont-0% cont-5% cont-10% cont-15%
## Min.           1      4      1      5
## 1st Qu.        3     14     26     33
## Median        44     37     48     69
## Mean          42     42     50     61
## 3rd Qu.       72     60     80     92
## Max.         100     99    100    100
## sd           34     28     30     31
## best mstop with CV from bst
##          cont-0% cont-5% cont-10% cont-15%
## Min.          10     15     16     10
## 1st Qu.       28     33     36     39
## Median       55     52     58     60
## Mean         53     53     58     60
## 3rd Qu.      74     70     76     84
## Max.        100     99     98    100
## sd          26     23     24     26
## nvar from bst
##          cont-0% cont-5% cont-10% cont-15%
## Min.          1.0     1.0     1.0     1.0
## 1st Qu.       1.0     2.0     3.0     4.0
## Median       2.0     3.0     5.0     7.0
## Mean        2.5     3.6     5.3     6.9
## 3rd Qu.      3.0     5.0     8.0     9.2
## Max.        9.0    10.0    13.0    15.0
## sd          1.8     2.2     2.9     3.6
##

```

```

## rbst family TLogitBoost, s=-0.2, nu=0.1
##
## best misclassification error from rbst
##      cont-0% cont-5% cont-10% cont-15%
## Min.    0.0562 0.0506 0.0506 0.0449
## 1st Qu. 0.0730 0.0674 0.0786 0.0786
## Median  0.0843 0.0843 0.0899 0.1011
## Mean    0.0838 0.0825 0.1022 0.1156
## 3rd Qu. 0.0955 0.0955 0.1124 0.1404
## Max.    0.1180 0.1292 0.2360 0.2865
## sd      0.0136 0.0164 0.0395 0.0539
## CV based misclassification error from rbst
##      cont-0% cont-5% cont-10% cont-15%
## Min.    0.0562 0.0562 0.0562 0.0562
## 1st Qu. 0.0786 0.0786 0.0843 0.0885
## Median  0.0899 0.0899 0.1011 0.1096
## Mean    0.0884 0.0920 0.1125 0.1326
## 3rd Qu. 0.0955 0.1067 0.1236 0.1699
## Max.    0.1180 0.1348 0.3146 0.3933
## sd      0.0131 0.0182 0.0453 0.0646
## best mstop with best misclassification error from rbst
##      cont-0% cont-5% cont-10% cont-15%
## Min.         1      4      1      4
## 1st Qu.       1     12     20     26
## Median       11     31     50     50
## Mean         29     37     49     53
## 3rd Qu.      58     62     83     81
## Max.         99     99    100    100
## sd           32     29     34     30
## best mstop with CV from rbst
##      cont-0% cont-5% cont-10% cont-15%
## Min.         10     13     10     11
## 1st Qu.      29     33     32     35
## Median       42     50     53     57
## Mean         48     53     53     57
## 3rd Qu.      68     74     75     81
## Max.         99    100     99    100
## sd           25     24     24     26
## nvar from rbst
##      cont-0% cont-5% cont-10% cont-15%
## Min.         1.0     1.0     1.0     1.0
## 1st Qu.       1.0     1.0     1.0     1.0
## Median       2.0     2.0     2.0     2.0
## Mean         1.8     1.8     2.1     2.4
## 3rd Qu.       2.0     2.0     3.0     3.0
## Max.         7.0     5.0     7.0     8.0
## sd           1.1     1.0     1.3     1.5
##
## bst family LogitBoost, nu=0.1

```

```

## best misclassification error from bst
##          cont-0% cont-5% cont-10% cont-15%
## Min.    0.0449  0.0562  0.0449  0.0506
## 1st Qu. 0.0730  0.0730  0.0786  0.1053
## Median  0.0843  0.0843  0.1124  0.1433
## Mean    0.0824  0.0896  0.1146  0.1487
## 3rd Qu. 0.0899  0.1067  0.1419  0.1798
## Max.    0.1461  0.1517  0.2303  0.3258
## sd      0.0152  0.0208  0.0419  0.0606
## CV based misclassification error from bst
##          cont-0% cont-5% cont-10% cont-15%
## Min.    0.0506  0.0562  0.0618  0.0562
## 1st Qu. 0.0843  0.0885  0.0997  0.1222
## Median  0.0899  0.1039  0.1348  0.1657
## Mean    0.0907  0.1027  0.1341  0.1735
## 3rd Qu. 0.1011  0.1180  0.1587  0.2107
## Max.    0.1573  0.1573  0.2697  0.3876
## sd      0.0145  0.0218  0.0444  0.0703
## best mstop with best misclassification error from bst
##          cont-0% cont-5% cont-10% cont-15%
## Min.         1      4      1      5
## 1st Qu.       3     14     26     33
## Median      44     37     48     69
## Mean        42     42     50     61
## 3rd Qu.     72     60     80     92
## Max.       100     99    100    100
## sd         34     28     30     31
## best mstop with CV from bst
##          cont-0% cont-5% cont-10% cont-15%
## Min.         10     15     16     10
## 1st Qu.      28     33     36     39
## Median      55     52     58     60
## Mean        53     53     58     60
## 3rd Qu.     74     70     76     84
## Max.       100     99     98    100
## sd         26     23     24     26
## nvar from bst
##          cont-0% cont-5% cont-10% cont-15%
## Min.         1.0     1.0     1.0     1.0
## 1st Qu.      1.0     2.0     3.0     4.0
## Median      2.0     3.0     5.0     7.0
## Mean        2.5     3.6     5.3     6.9
## 3rd Qu.     3.0     5.0     8.0     9.2
## Max.        9.0    10.0    13.0    15.0
## sd         1.8     2.2     2.9     3.6
##
## rbst family DlogitBoost, s=0.8, nu=0.1
##
## best misclassification error from rbst

```

```

##          cont-0% cont-5% cont-10% cont-15%
## Min.      0.0562 0.0506 0.0506 0.0562
## 1st Qu.   0.0786 0.0730 0.0843 0.1011
## Median    0.0899 0.0899 0.1124 0.1461
## Mean      0.0868 0.0907 0.1197 0.1556
## 3rd Qu.   0.0955 0.1067 0.1461 0.2079
## Max.      0.1685 0.1685 0.2978 0.3652
## sd        0.0162 0.0240 0.0503 0.0730
## CV based misclassification error from rbst
##          cont-0% cont-5% cont-10% cont-15%
## Min.      0.0562 0.0562 0.0562 0.0618
## 1st Qu.   0.0786 0.0786 0.0899 0.1067
## Median    0.0899 0.0955 0.1124 0.1601
## Mean      0.0898 0.0997 0.1316 0.1708
## 3rd Qu.   0.1011 0.1180 0.1573 0.2317
## Max.      0.1798 0.1966 0.3202 0.3708
## sd        0.0163 0.0265 0.0562 0.0787
## best mstop with best misclassification error from rbst
##          cont-0% cont-5% cont-10% cont-15%
## Min.           1      6      1      7
## 1st Qu.        1     19     34     41
## Median         1     52     62     70
## Mean          19     51     59     66
## 3rd Qu.       31     78     89     92
## Max.         100    100    100    100
## sd           31     31     32     28
## best mstop with CV from rbst
##          cont-0% cont-5% cont-10% cont-15%
## Min.          10     18     15     11
## 1st Qu.       37     47     52     52
## Median        56     64     68     74
## Mean         56     63     68     70
## 3rd Qu.      74     78     84     90
## Max.         99    100    100    100
## sd          24     21     21     24
## nvar from rbst
##          cont-0% cont-5% cont-10% cont-15%
## Min.          1.0     1.0     1.0     1.0
## 1st Qu.       1.0     1.0     1.0     2.0
## Median        1.0     1.0     2.0     3.0
## Mean         1.4     1.7     2.5     2.9
## 3rd Qu.       2.0     2.0     3.0     4.0
## Max.         5.0     5.0     8.0     8.0
## sd          0.8     0.9     1.5     1.4
##
## bst family HingeBoost, nu=0.1
## best misclassification error from bst
##          cont-0% cont-5% cont-10% cont-15%
## Min.      0.0449 0.0506 0.0449 0.0562

```

```

## 1st Qu.  0.0730  0.0730  0.0772  0.0786
## Median   0.0786  0.0843  0.0843  0.1011
## Mean     0.0788  0.0839  0.0954  0.1130
## 3rd Qu.  0.0843  0.0899  0.1081  0.1362
## Max.     0.1292  0.1348  0.2079  0.2528
## sd       0.0137  0.0177  0.0296  0.0414
## CV based misclassification error from bst
##          cont-0% cont-5% cont-10% cont-15%
## Min.     0.0562  0.0618  0.0562  0.0674
## 1st Qu.  0.0843  0.0843  0.0899  0.1011
## Median   0.0955  0.0955  0.1011  0.1264
## Mean     0.0931  0.0996  0.1165  0.1379
## 3rd Qu.  0.1011  0.1067  0.1348  0.1685
## Max.     0.1629  0.1910  0.3427  0.2809
## sd       0.0158  0.0230  0.0414  0.0492
## best mstop with best misclassification error from bst
##          cont-0% cont-5% cont-10% cont-15%
## Min.           1         1         1         1
## 1st Qu.        18        18        15        21
## Median         24        23        25        44
## Mean           27        28        36        48
## 3rd Qu.        32        30        56        76
## Max.           89       100       100       99
## sd             17        23        30        32
## best mstop with CV from bst
##          cont-0% cont-5% cont-10% cont-15%
## Min.           10        10        10        10
## 1st Qu.         10        16        19        27
## Median          23        26        30        42
## Mean            28        35        37        50
## 3rd Qu.         35        54        51        74
## Max.            99        95       100       100
## sd              20        25        23        28
## nvar from bst
##          cont-0% cont-5% cont-10% cont-15%
## Min.            1.0       1.0       1.0       1.0
## 1st Qu.          1.0       1.0       2.0       3.0
## Median           3.0       4.0       5.0      11.0
## Mean             6.6       8.9       8.8      12.4
## 3rd Qu.           9.0      15.0      14.2      20.0
## Max.            36.0      30.0      32.0      36.0
## sd              7.8       9.1       8.4       9.8
##
## rbst family THingeBoost, s=-0.5, nu=0.1
##
## best misclassification error from rbst
##          cont-0% cont-5% cont-10% cont-15%
## Min.           0.0506  0.0506  0.0449  0.0506
## 1st Qu.        0.0730  0.0730  0.0772  0.0786

```



```

## Median    0.0786  0.0815  0.0843  0.0871
## Mean      0.0790  0.0817  0.0906  0.1007
## 3rd Qu.   0.0843  0.0899  0.1011  0.1236
## Max.      0.1348  0.1348  0.2022  0.1910
## sd        0.0135  0.0147  0.0253  0.0336
## CV based misclassification error from rbst
##          cont-0% cont-5% cont-10% cont-15%
## Min.     0.0562  0.0618  0.0618  0.0618
## 1st Qu.  0.0843  0.0843  0.0899  0.0941
## Median   0.0955  0.0955  0.1011  0.1067
## Mean     0.0937  0.0957  0.1076  0.1197
## 3rd Qu.  0.1011  0.1011  0.1180  0.1362
## Max.     0.1461  0.1517  0.2022  0.2640
## sd       0.0149  0.0173  0.0295  0.0411
## best mstop with best misclassification error from rbst
##          cont-0% cont-5% cont-10% cont-15%
## Min.           1         1         1         1
## 1st Qu.        17        17        16        20
## Median         23        23        24        29
## Mean           25        28        35        38
## 3rd Qu.        29        30        50        59
## Max.           93        99       100        99
## sd             18        22        30        27
## best mstop with CV from rbst
##          cont-0% cont-5% cont-10% cont-15%
## Min.           10        10        10        10
## 1st Qu.         10        18        19        22
## Median         23        28        34        44
## Mean           33        38        41        48
## 3rd Qu.        45        56        59        68
## Max.           99       100        96        99
## sd             25        27        26        28
## nvar from rbst
##          cont-0% cont-5% cont-10% cont-15%
## Min.           1.0       1.0       1.0       1.0
## 1st Qu.         1.0       1.8       2.0       2.0
## Median         4.0       4.0       7.5      11.0
## Mean           8.4       9.4       9.6      11.2
## 3rd Qu.       13.2      16.0      14.0      18.0
## Max.          33.0      34.0      30.0      33.0
## sd             9.0       9.5       8.7       9.0
##
## bst family AdaBoost, nu=0.1
## best misclassification error from bst
##          cont-0% cont-5% cont-10% cont-15%
## Min.           0.0449  0.0562  0.0449  0.0506
## 1st Qu.        0.0716  0.0730  0.0786  0.1011
## Median         0.0786  0.0843  0.1039  0.1264
## Mean           0.0797  0.0870  0.1073  0.1310

```

```

## 3rd Qu.  0.0857  0.0955  0.1292  0.1573
## Max.    0.1461  0.1461  0.2079  0.3034
## sd      0.0147  0.0198  0.0339  0.0443
## CV based misclassification error from bst
##          cont-0% cont-5% cont-10% cont-15%
## Min.    0.0618  0.0562  0.0618  0.0730
## 1st Qu. 0.0786  0.0899  0.1053  0.1222
## Median  0.0955  0.1067  0.1348  0.1517
## Mean    0.0923  0.1072  0.1333  0.1585
## 3rd Qu. 0.1011  0.1236  0.1573  0.1910
## Max.    0.1573  0.1573  0.2360  0.3146
## sd      0.0156  0.0237  0.0407  0.0473
## best mstop with best misclassification error from bst
##          cont-0% cont-5% cont-10% cont-15%
## Min.      1      1      1      2
## 1st Qu.    9      4      7      9
## Median    21     12     14     23
## Mean      25     17     25     39
## 3rd Qu.   35     26     32     72
## Max.     93     98     100    100
## sd       21     17     26     33
## best mstop with CV from bst
##          cont-0% cont-5% cont-10% cont-15%
## Min.      10     10     10     10
## 1st Qu.   13     12     14     15
## Median    21     18     24     34
## Mean      28     33     33     44
## 3rd Qu.   35     49     46     70
## Max.     92     99     100    99
## sd       20     28     26     30
## nvar from bst
##          cont-0% cont-5% cont-10% cont-15%
## Min.      1.0    1.0    1.0    1.0
## 1st Qu.   1.0    2.0    3.0    4.8
## Median    3.0    4.0    7.0   11.0
## Mean      4.1    6.6    8.6   11.7
## 3rd Qu.   6.0   10.2   12.0   17.0
## Max.     17.0   21.0   25.0   27.0
## sd       3.8    5.6    6.0    7.0
##
## rbst family TAdaBoost, s=-0.2, nu=0.1
##
## best misclassification error from rbst
##          cont-0% cont-5% cont-10% cont-15%
## Min.    0.0562  0.0618  0.0562  0.0562
## 1st Qu. 0.0786  0.0786  0.0899  0.0955
## Median  0.0843  0.0899  0.1039  0.1236
## Mean    0.0856  0.0936  0.1059  0.1258
## 3rd Qu. 0.0955  0.1011  0.1180  0.1517

```

```

## Max.      0.1348  0.1573  0.1910  0.2360
## sd        0.0150  0.0195  0.0236  0.0380
## CV based misclassification error from rbst
##          cont-0% cont-5% cont-10% cont-15%
## Min.      0.0562  0.0618  0.0730  0.0674
## 1st Qu.   0.0843  0.0955  0.1067  0.1236
## Median    0.0955  0.1067  0.1236  0.1461
## Mean      0.0978  0.1097  0.1289  0.1511
## 3rd Qu.   0.1067  0.1194  0.1419  0.1798
## Max.      0.1742  0.2472  0.2584  0.2921
## sd        0.0198  0.0269  0.0344  0.0425
## best mstop with best misclassification error from rbst
##          cont-0% cont-5% cont-10% cont-15%
## Min.           1      2      1      1
## 1st Qu.        14     15     14     12
## Median         36     37     40     39
## Mean           42     39     44     42
## 3rd Qu.        70     60     70     69
## Max.           97     98    100     94
## sd             31     28     31     30
## best mstop with CV from rbst
##          cont-0% cont-5% cont-10% cont-15%
## Min.           10     10     10     10
## 1st Qu.         14     15     19     13
## Median          28     36     38     30
## Mean            38     43     42     38
## 3rd Qu.         62     70     61     64
## Max.            100    100    100     98
## sd              28     28     26     28
## nvar from rbst
##          cont-0% cont-5% cont-10% cont-15%
## Min.           1.0     1.0     1.0     1.0
## 1st Qu.         2.0     3.0     4.0     3.0
## Median          3.0     6.0     8.0     8.0
## Mean            4.5     7.6     8.8     8.7
## 3rd Qu.         7.0    11.0    12.0    12.2
## Max.            18.0    22.0    26.0    28.0
## sd              3.7     5.4     5.7     6.2
print(proc.time() - ptm)
##          user      system  elapsed
## 63699.147  2680.213  27237.484

```

### Misclassification error

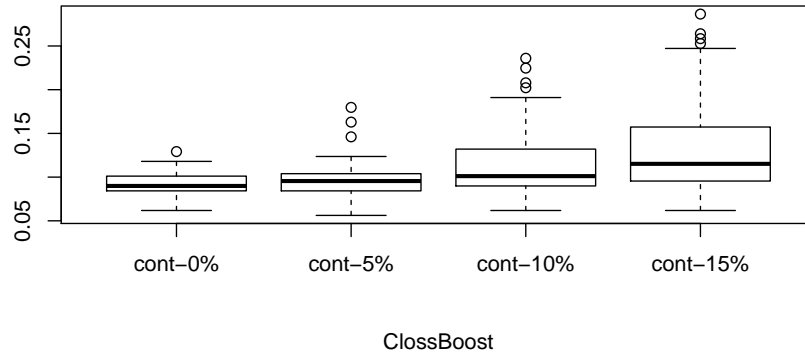

### Misclassification error

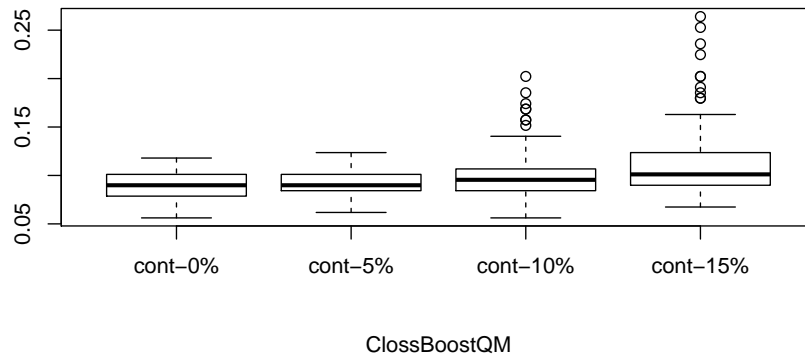

**No. variables**

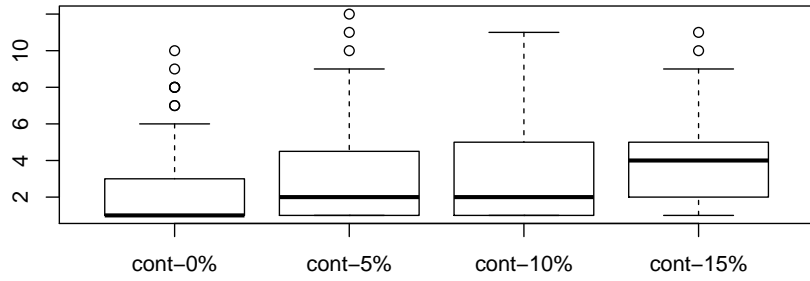

ClossBoost

**No. variables**

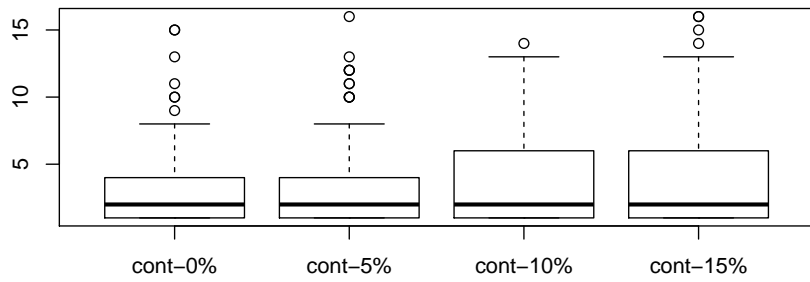

ClossBoostQM

### Misclassification error

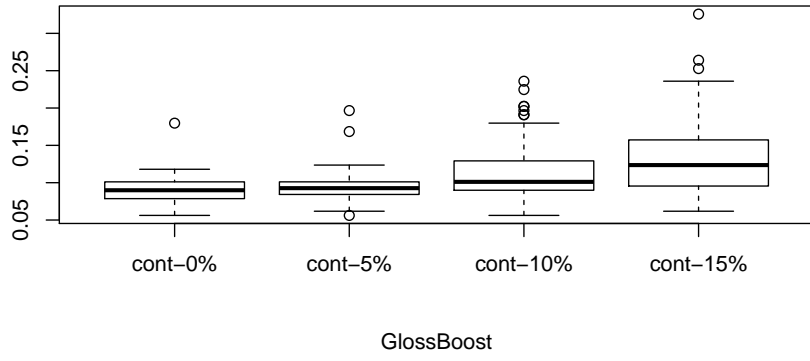

### Misclassification error

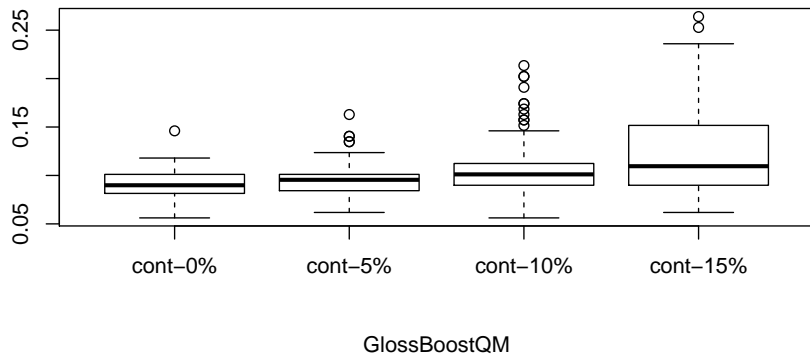

**No. variables**

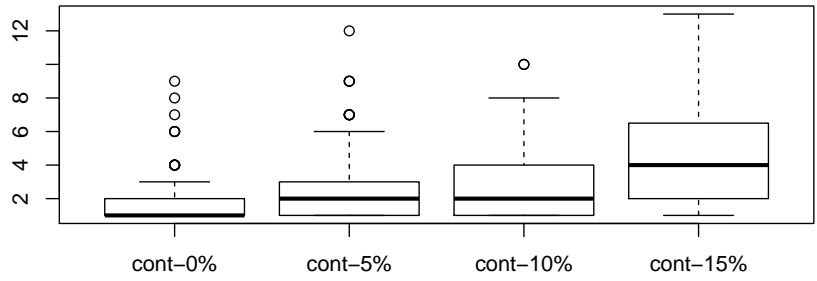

GlossBoost

**No. variables**

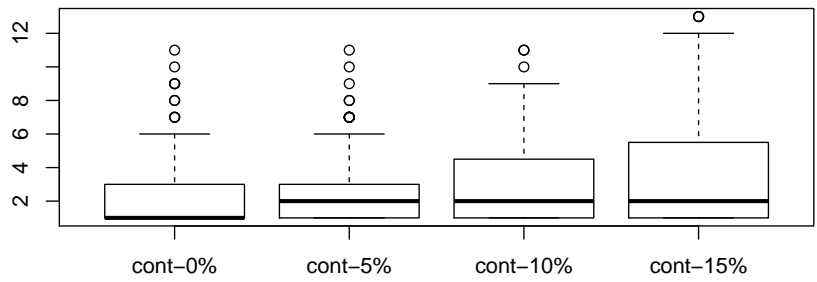

GlossBoostQM

### Misclassification error

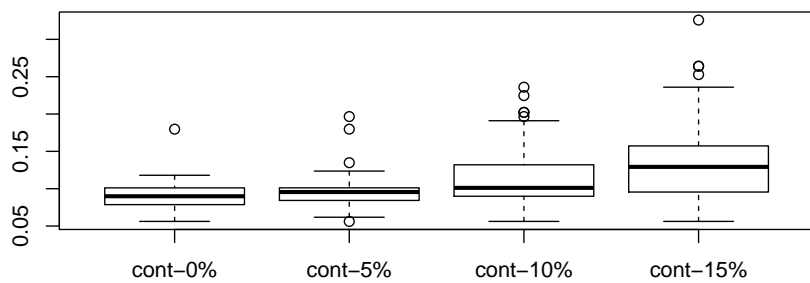

QlossBoost

### Misclassification error

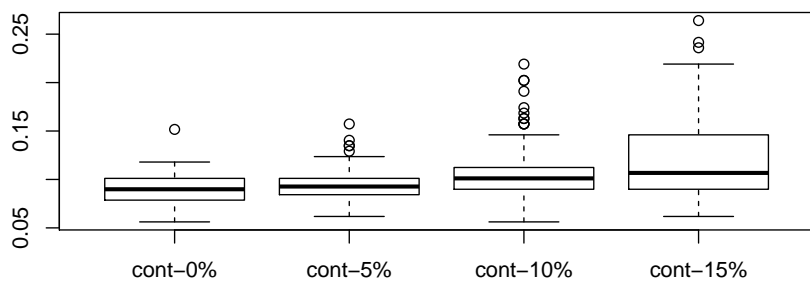

QlossBoostQM



**No. variables**

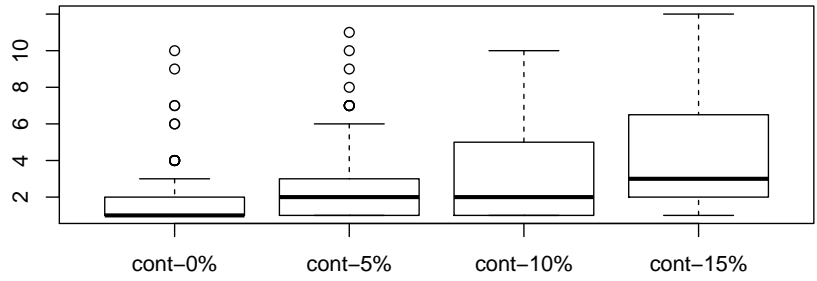

QlossBoost

**No. variables**

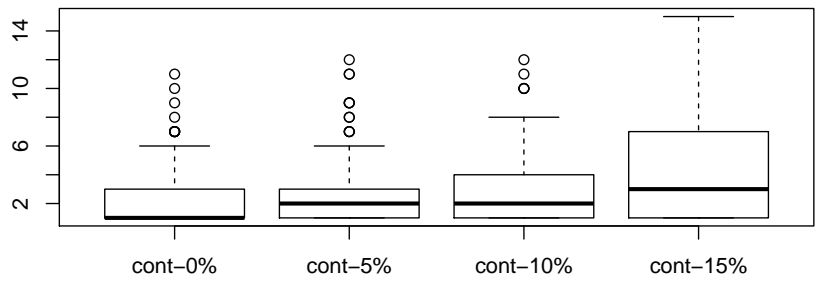

QlossBoostQM

### Misclassification error

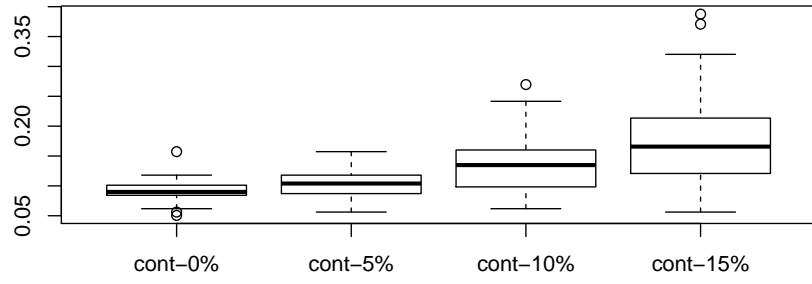

LogitBoost

### Misclassification error

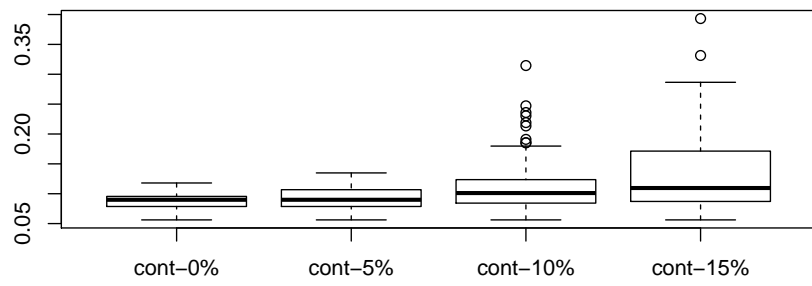

TLogitBoost

**No. variables**

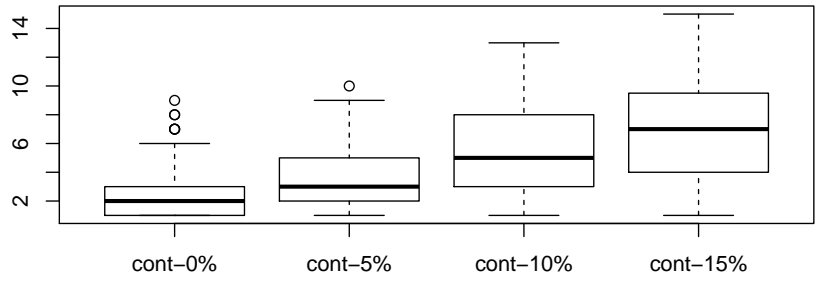

LogitBoost

**No. variables**

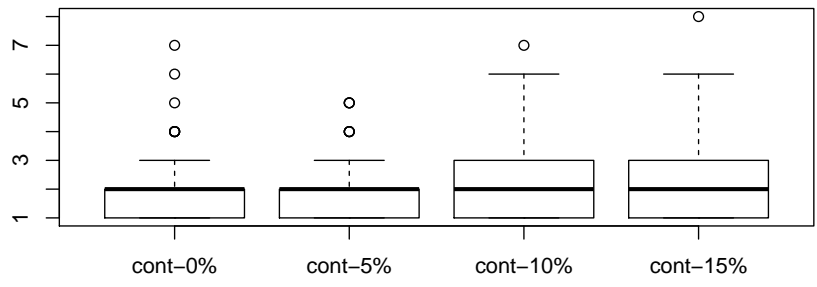

TLogitBoost

### Misclassification error

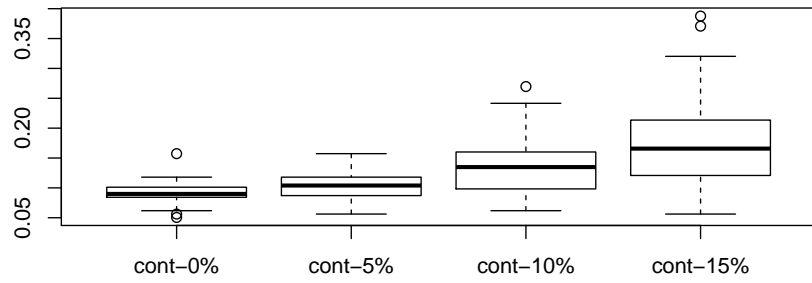

LogitBoost

### Misclassification error

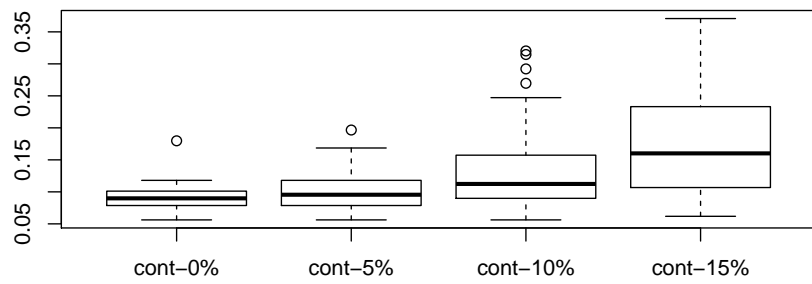

DlogitBoost

**No. variables**



LogitBoost

**No. variables**

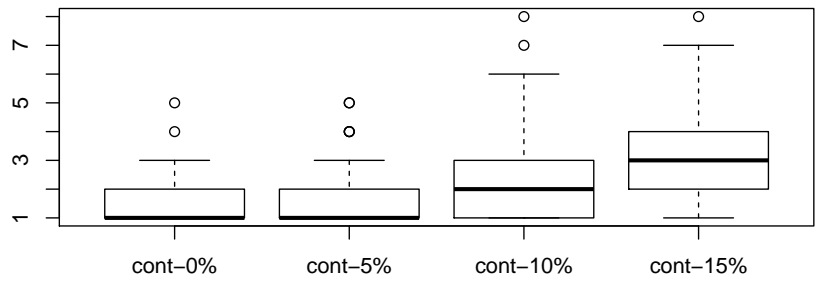

DlogitBoost

### Misclassification error

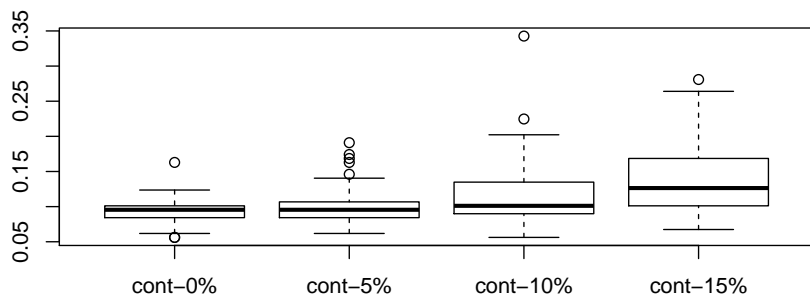

HingeBoost

### Misclassification error

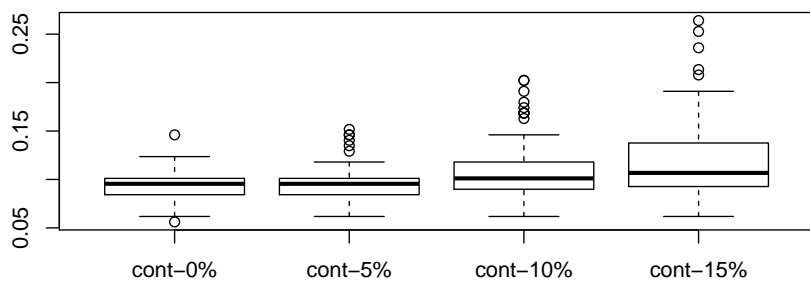

THingeBoost

**No. variables**

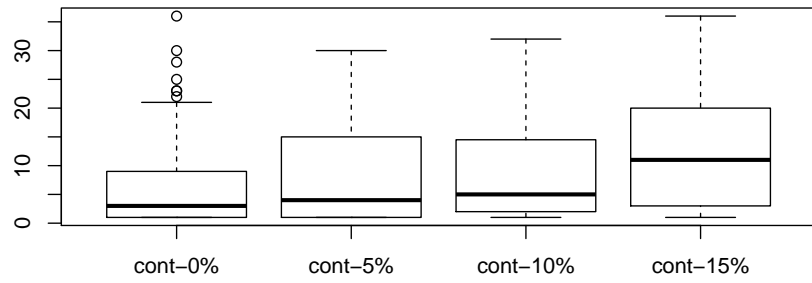

HingeBoost

**No. variables**

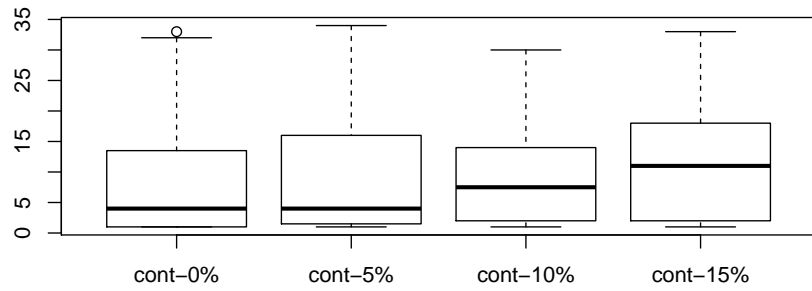

THingeBoost

### Misclassification error

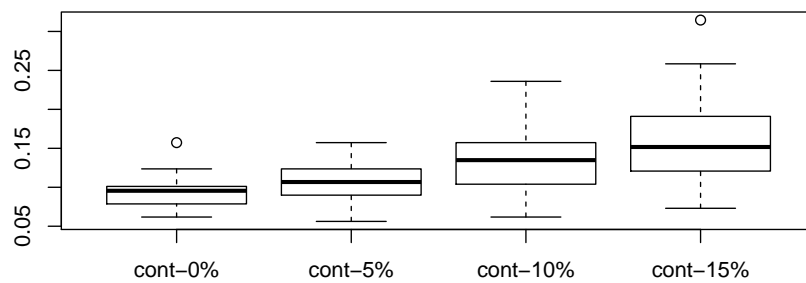

AdaBoost

### Misclassification error

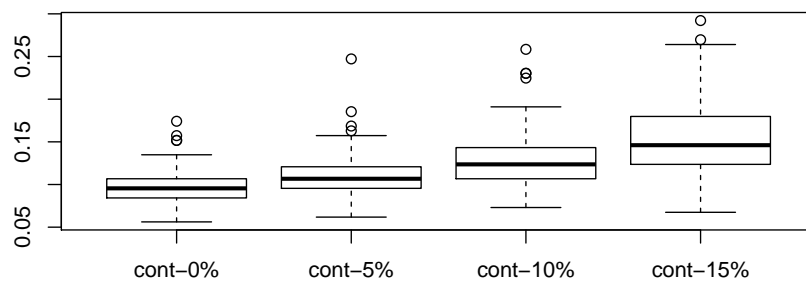

TAdaBoost



### No. variables

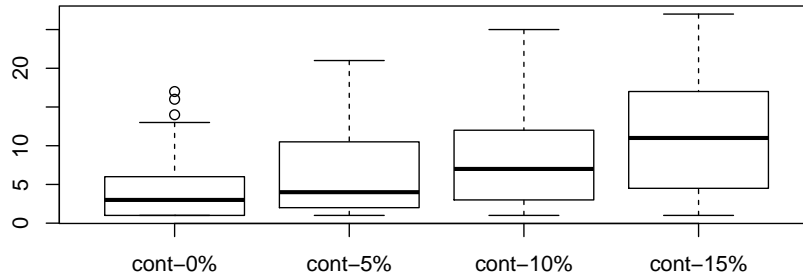

AdaBoost

### No. variables

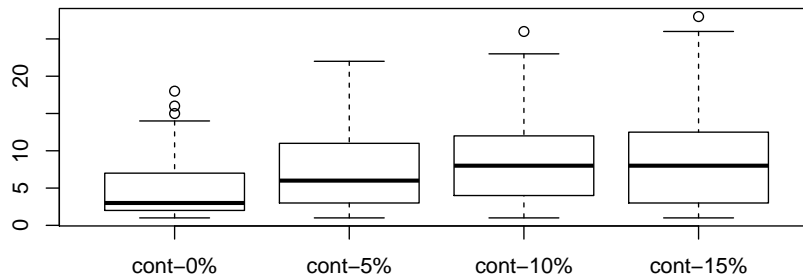

TAdaBoost

```
sessionInfo()
## R version 3.3.0 (2016-05-03)
## Platform: x86_64-pc-linux-gnu (64-bit)
## Running under: Ubuntu 14.04.3 LTS
##
## locale:
## [1] LC_CTYPE=en_US.UTF-8      LC_NUMERIC=C
## [3] LC_TIME=en_US.UTF-8      LC_COLLATE=en_US.UTF-8
## [5] LC_MONETARY=en_US.UTF-8  LC_MESSAGES=en_US.UTF-8
## [7] LC_PAPER=en_US.UTF-8     LC_NAME=C
## [9] LC_ADDRESS=C              LC_TELEPHONE=C
## [11] LC_MEASUREMENT=en_US.UTF-8 LC_IDENTIFICATION=C
##
## attached base packages:
## [1] parallel splines stats graphics grDevices
## [6] utils datasets methods base
##
## other attached packages:
## [1] bst_0.3-14 gbm_2.1.1 lattice_0.20-33
## [4] survival_2.39-4 gdata_2.17.0 knitr_1.11
```

```
##  
## loaded via a namespace (and not attached):  
## [1] codetools_0.2-14 gtools_3.5.0    foreach_1.4.2  
## [4] grid_3.3.0        formatR_1.2.1    magrittr_1.5  
## [7] evaluate_0.8      stringi_0.4-1    doParallel_1.0.8  
## [10] rpart_4.1-10     Matrix_1.2-5     iterators_1.0.7  
## [13] tools_3.3.0      stringr_1.0.0    compiler_3.3.0
```

## References

Zhu Wang. Robust boosting with truncated loss functions. 2016a. manuscript.

Zhu Wang. Quadratic majorization for nonconvex loss with applications to boosting algorithm. 2016b. manuscript.
